# Supplementary material
Source: MDPI journal article supplement (https://www.mdpi.com/2304-6767/12/1/13)
Supplement: s1 [file s1]

## Supplementary File S2:

### Search strategies for additional databases

#### CINAHL (EBSCOhost)

Search conducted on 6 May 2022

N=1

We extracted the RCT string and its related information from page 40 of the Technical Supplement to Chapter 4: Searching for and selecting studies of the Cochrane Handbook for Systematic Reviews of Interventions Version 6.3. The formal RCT string for CINAHL has been developed for CINAHL Plus, which we did not have access to and adapted for CINAHL.

(MH randomized controlled trials OR MH double-blind studies OR MH single-blind studies OR MH random assignment OR MH pretest-posttest design OR MH cluster sample OR TI (randomised OR randomized) OR AB (random\*) OR TI (trial) OR (MH (sample size) AND AB (assigned OR allocated OR control)) OR MH (placebos) OR PT (randomized controlled trial) OR AB (CONTROL W5 GROUP) OR MH (CROSSOVER DESIGN) OR MH (COMPARATIVE STUDIES) OR AB (CLUSTER W3 RCT)) NOT ((MH ANIMALS+ NOT MH HUMAN) OR (MH (ANIMAL STUDIES) NOT MH (HUMAN))) OR (TI (ANIMAL MODEL) NOT MH (HUMAN))) The CINAHL Plus RCT filter search was validated and published in February 2019 by Glanville et al.[42]. The filter was adapted as an API direct feed by Metaxis in October 2019 and results were screened for inclusion in CENTRAL by Cochrane's RCT Classifier and by Cochrane Crowd.

|     |                                                                                                                                                   |         |
|-----|---------------------------------------------------------------------------------------------------------------------------------------------------|---------|
| S1  | MH randomized controlled trials OR double-blind studies OR single-blind studies OR random assignment OR pretest-posttest design OR cluster sample | 243,561 |
| S2  | TI (randomised OR randomized ) OR AB random* OR TI trial                                                                                          | 455,216 |
| S3  | MH sample size AND AB ( assigned OR allocated OR control )                                                                                        | 4,333   |
| S4  | MH placebos OR PT randomized controlled trial                                                                                                     | 149,926 |
| S5  | AB CONTROL W5 GROUP                                                                                                                               | 133,057 |
| S6  | MH CROSSOVER DESIGN OR MH COMPARATIVE STUDIES                                                                                                     | 451,505 |
| S7  | AB CLUSTER W3 RCT                                                                                                                                 | 452     |
| S8  | S1 OR S2 OR S3 OR S4 OR S5 OR S6 OR S7                                                                                                            | 951,696 |
| S9  | MH ANIMALS+ NOT MH HUMAN                                                                                                                          | 90,912  |
| S10 | MH ANIMAL STUDIES NOT MH HUMAN                                                                                                                    | 121,721 |

|     |                                                                                                                                                                                                                                                                                                                                                                                                                          |         |
|-----|--------------------------------------------------------------------------------------------------------------------------------------------------------------------------------------------------------------------------------------------------------------------------------------------------------------------------------------------------------------------------------------------------------------------------|---------|
| S11 | TI ANIMAL MODEL NOT MH HUMAN                                                                                                                                                                                                                                                                                                                                                                                             | 3,184   |
| S12 | S9 OR S10 OR S11                                                                                                                                                                                                                                                                                                                                                                                                         | 204,521 |
| S13 | S8 NOT S12                                                                                                                                                                                                                                                                                                                                                                                                               | 906,320 |
| S14 | Recurrent aphthous ulceration OR Recurrent aphthous ulcer OR Recurrent aphthous ulcers OR Recurrent aphthous stomatitis                                                                                                                                                                                                                                                                                                  | 745     |
| S15 | MH stomatitis aphthous                                                                                                                                                                                                                                                                                                                                                                                                   | 0       |
| S16 | MJ stomatitis aphthous                                                                                                                                                                                                                                                                                                                                                                                                   | 613     |
| S17 | canker sores OR canker sore OR periadenitis mucosa necrotica recurrens OR aphthous ulcer OR aphthous ulcers OR aphthous ulceration OR aphthous ulcerations OR aphthous stomatitis OR aphthous stomatitides OR mouth ulcer OR mouth ulcers OR mouth ulceration OR mouth ulcerations OR oral ulcers OR oral ulcer OR oral ulceration OR oral ulcerations OR Sutton's OR Suttons OR Sutton OR Behcets OR Behcet's OR Behcet | 8,122   |
| S18 | S14 OR S16 OR S17                                                                                                                                                                                                                                                                                                                                                                                                        | 8,122   |
| S19 | MH propolis                                                                                                                                                                                                                                                                                                                                                                                                              | 168     |
| S20 | propolis OR propolin OR bee glue OR bee bread OR cera alba OR galangin OR nivcrisol OR Apitherapy                                                                                                                                                                                                                                                                                                                        | 946     |
| S21 | S19 OR S20                                                                                                                                                                                                                                                                                                                                                                                                               | 946     |
| S22 | S13 AND S18 AND S21                                                                                                                                                                                                                                                                                                                                                                                                      | 1       |

## Cochrane Central Register of Controlled Trial (CENTRAL)

Search conducted 6 May 2022

N=17

|    |                                                                                                                                                                                                                                                                                                                                                                                                                                                           |      |
|----|-----------------------------------------------------------------------------------------------------------------------------------------------------------------------------------------------------------------------------------------------------------------------------------------------------------------------------------------------------------------------------------------------------------------------------------------------------------|------|
| #1 | "Recurrent aphthous ulceration" OR "Recurrent aphthous ulcer" OR "Recurrent aphthous ulcers" OR "Recurrent aphthous stomatitis"                                                                                                                                                                                                                                                                                                                           | 399  |
| #2 | MeSH descriptor: [Stomatitis Aphthous] explode all trees                                                                                                                                                                                                                                                                                                                                                                                                  | 245  |
| #3 | "canker sores" OR "canker sore" OR "peradenitis mucosa necrotica recurrens" OR "aphthous ulcer" OR "aphthous ulcers" OR "aphthous ulceration" OR "aphthous ulcerations" OR "aphthous stomatitis" OR "aphthous stomatitides" OR "mouth ulcer" OR "mouth ulcers" OR "mouth ulceration" OR "mouth ulcerations" OR "oral ulcers" OR "oral ulcer" OR "oral ulceration" OR "oral ulcerations" OR Sutton's OR Suttons OR Sutton OR Behcets OR Behcet's OR Behcet | 3388 |
| #4 | #1 OR #2 OR #3                                                                                                                                                                                                                                                                                                                                                                                                                                            | 3404 |
| #5 | MeSH descriptor: [Propolis] explode all trees                                                                                                                                                                                                                                                                                                                                                                                                             | 126  |
| #6 | propolis OR propolin OR "bee glue" OR "bee bread" OR "cera alba" OR galangin OR nivcrisol OR Apitherapy                                                                                                                                                                                                                                                                                                                                                   | 521  |
| #7 | #5 OR #6                                                                                                                                                                                                                                                                                                                                                                                                                                                  | 521  |
| #8 | #4 AND #7 in Trials                                                                                                                                                                                                                                                                                                                                                                                                                                       | 17   |

clinicaltrials.gov (<https://clinicaltrials.gov/>)

N=1

Search conducted on 6 May 2022

propolis OR propolin OR "bee glue" OR "bee bread" OR "cera alba" OR galangin OR nivcrisol

AND

"aphthous ulcers" OR "aphthous stomatitis" OR "canker sores" OR "peradenitis mucosa necrotica recurrens" OR "aphthous stomatitides" OR Behcet

propolis OR propolin OR "bee glue" OR "bee bread" OR "cera alba" OR galangin OR nivcrisol OR Apitherapy |  
Interventional Studies | "aphthous ulcers" OR "aphthous stomatitis" OR "canker sores" OR "peradenitis mucosa necrotica recurrens" OR "aphthous stomatitides" OR Behcet

Applied Filters: ☒ Interventional

## WHO International Clinical Trials Registry Platform (<https://trialsearch.who.int/>)

N=1

Search conducted on 6 May 2022

"aphthous ulcers" OR "aphthous stomatitis" OR "canker sores" OR "peradenitis mucosa necrotica recurrens" OR "aphthous stomatitides" OR Behcet in the Condition

AND

propolis OR propolin OR "bee glue" OR "bee bread" OR "cera alba" OR galangin OR nivcrisol in the Intervention

Recruitment status is ALL

← → ↻ [trialsearch.who.int/AdvSearch.aspx](https://trialsearch.who.int/AdvSearch.aspx)

Apps YouTube Maps Gmail MySUN Menu Covidence lets you... Rayyan <https://revman.coc...> PubMed Internet Banking | C... Single Sign-on | Ste... Placement+ Service project Yr - Eversdal - Weat... Hi

 **World Health Organization**

 **International Clinical Trials Registry Platform Search Portal**

Home Advanced Search List By Search Tips UTN ICTRP website REGTRAC Contact us

Fields can be left blank. Click on the field name hyperlink for an explanation of each search field

Look for trials with the exact phrase or contains

AND

AND

☐ Restrict to COVID-19

☐ Search for [clinical trials in children](#)

in the [Title](#)

in the [Condition](#)

in the [Intervention](#)

☐ Without synonyms

☐ Without synonyms

Recruitment status is

Primary sponsor is or contains

Secondary ID is or contains

Countries of recruitment are

Free Text Country :

<< >>

Clear

← → ↻ [trialsearch.who.int/AdvSearch.aspx](https://trialsearch.who.int/AdvSearch.aspx)

Apps YouTube Maps Gmail MySUN Menu Covidence lets you... Rayyan <https://revman.coc...> PubMed Internet Banking | C... Single Sign-on | Ste... Placement+ Service project Yr - Eversdal - Weat... Home : Cees van d... My presentations ...

 **World Health Organization**

 **International Clinical Trials Registry Platform Search Portal**

Home Advanced Search List By Search Tips UTN ICTRP website REGTRAC Contact us

Back to Search 1 records for 1 trials found!

Show 10 records per page [Export results to XML](#)

[Display synonyms](#)

1

| Recruitment status | Prospective Registration | Main ID             | Public Title                                                                | Date of Registration | Results available |
|--------------------|--------------------------|---------------------|-----------------------------------------------------------------------------|----------------------|-------------------|
| Not Recruiting     | No                       | IRCT2013072214101N1 | <a href="#">The affect of bees propolis in reducing the aphthous ulcers</a> | 2013-10-15           |                   |

1

Disclaimer: Trials posted on this search portal are not endorsed by WHO, but are provided as a service to our users. In no event shall the World Health Organization be liable for any damages arising from the use of the information linked to in this section. None of the information obtained through use of the search portal should in any way be used in clinical care without consulting a physician or licensed health professional. WHO is not responsible for the accuracy, completeness and/or use made of the content displayed for any trial record.

Copyright © World Health Organization - Version 3.6 - [Version history](#)

Search conducted on 6 May 2022

propolis OR propolin OR "bee glue" OR "bee bread" OR "cera alba" OR galangin OR nivcrisol OR Apitherapy in  
Anywhere

AND

"canker sores" OR "canker sore" OR "periadenitis mucosa necrotica recurrens" OR "aphthous ulcer" OR "aphthous  
ulcers" OR "aphthous ulceration" OR "aphthous ulcerations" OR "aphthous stomatitis" OR "aphthous stomatitides" OR  
"mouth ulcer" OR "mouth ulcers" OR "mouth ulceration" OR "mouth ulcerations" OR "oral ulcers" OR "oral ulcer" OR  
"oral ulceration" OR "oral ulcerations" OR Sutton's OR Suttons OR Sutton OR Behcets OR Behcet's OR Behcet OR  
"Recurrent aphthous ulceration" OR "Recurrent aphthous ulcer" OR "Recurrent aphthous ulcers" OR "Recurrent  
aphthous stomatitis" in Anywhere

ProQuest Access provided by Stellenbosch University

ProQuest Dissertations & Theses A&I

Advanced Search [Command Line](#) [Recent searches](#) [Field codes](#) [Search tips](#) [SU Library and Information Service](#)

propolis OR propolin OR "bee glue" OR "bee bread" OR "cera alba" OR galangin OR nivcrisol OR Apitherapy in Anywhere

AND "canker sores" OR "canker sore" OR "periadenitis mucosa necrotica recurrens" OR "aphthous ulcer" OR "aphthous ulcers" OR "aphthous ulceration" OR "aphthous ulcerations" OR "aphthous stomatitis" OR "aphthous stomatitides" OR "mouth ulcer" OR "mouth ulcers" OR "mouth ulceration" OR "mouth ulcerations" OR "oral ulcers" OR "oral ulcer" OR "oral ulceration" OR "oral ulcerations" OR Sutton's OR Suttons OR Sutton OR Behcets OR Behcet's OR Behcet OR "Recurrent aphthous ulceration" OR "Recurrent aphthous ulcer" OR "Recurrent aphthous ulcers" OR "Recurrent aphthous stomatitis" where

[Add a row](#)

Publication date: All dates

Search conducted on 08 May 2022

|     |                                                                                                                                                                                                                                                                                                                                                                                                                          |        |
|-----|--------------------------------------------------------------------------------------------------------------------------------------------------------------------------------------------------------------------------------------------------------------------------------------------------------------------------------------------------------------------------------------------------------------------------|--------|
| S1  | randomized controlled trials OR double-blind studies OR single-blind studies OR random assignment OR pretest-posttest design OR cluster sample                                                                                                                                                                                                                                                                           | 10,619 |
| S2  | TI ( randomised OR randomized ) OR AB random* OR TI trial                                                                                                                                                                                                                                                                                                                                                                | 34,440 |
| S3  | sample size AND AB ( assigned OR allocated OR control )                                                                                                                                                                                                                                                                                                                                                                  | 848    |
| S4  | placebos OR PT randomized controlled trial                                                                                                                                                                                                                                                                                                                                                                               | 3,403  |
| S5  | AB CONTROL W5 GROUP                                                                                                                                                                                                                                                                                                                                                                                                      | 20,428 |
| S6  | CROSSOVER DESIGN OR MH COMPARATIVE STUDIES                                                                                                                                                                                                                                                                                                                                                                               | 7,960  |
| S7  | AB CLUSTER W3 RCT                                                                                                                                                                                                                                                                                                                                                                                                        | 19     |
| S8  | S1 OR S2 OR S3 OR S4 OR S5 OR S6 OR S7                                                                                                                                                                                                                                                                                                                                                                                   | 55,227 |
| S9  | ANIMALS+ NOT MH HUMAN                                                                                                                                                                                                                                                                                                                                                                                                    | 0      |
| S10 | ANIMAL STUDIES NOT MH HUMAN                                                                                                                                                                                                                                                                                                                                                                                              | 3,988  |
| S11 | TI ANIMAL MODEL NOT MH HUMAN                                                                                                                                                                                                                                                                                                                                                                                             | 228    |
| S12 | S9 OR S10 OR S11                                                                                                                                                                                                                                                                                                                                                                                                         | 4,136  |
| S13 | S8 NOT S12                                                                                                                                                                                                                                                                                                                                                                                                               | 53,659 |
| S14 | Recurrent aphthous ulceration OR Recurrent aphthous ulcer OR Recurrent aphthous ulcers OR Recurrent aphthous stomatitis                                                                                                                                                                                                                                                                                                  | 608    |
| S15 | stomatitis aphthous                                                                                                                                                                                                                                                                                                                                                                                                      | 519    |
| S16 | stomatitis aphthous                                                                                                                                                                                                                                                                                                                                                                                                      | 519    |
| S17 | canker sores OR canker sore OR periadenitis mucosa necrotica recurrens OR aphthous ulcer OR aphthous ulcers OR aphthous ulceration OR aphthous ulcerations OR aphthous stomatitis OR aphthous stomatitides OR mouth ulcer OR mouth ulcers OR mouth ulceration OR mouth ulcerations OR oral ulcers OR oral ulcer OR oral ulceration OR oral ulcerations OR Sutton's OR Suttons OR Sutton OR Behcets OR Behcet's OR Behcet | 1,736  |
| S18 | S14 OR S16 OR S17                                                                                                                                                                                                                                                                                                                                                                                                        | 1,736  |
| S19 | propolis                                                                                                                                                                                                                                                                                                                                                                                                                 | 292    |
| S20 | propolis OR propolin OR bee glue OR bee bread OR cera alba OR galangin OR nivcrisol OR Apitherapy                                                                                                                                                                                                                                                                                                                        | 308    |
| S21 | S19 OR S20                                                                                                                                                                                                                                                                                                                                                                                                               | 308    |
| S22 | S13 AND S18 AND S21                                                                                                                                                                                                                                                                                                                                                                                                      | 2      |

**Embase (Ovid)**

Search conducted on 12 May 2022

N=48

Embase 1947-Present, updated daily

|   |                                                                                                               |      |
|---|---------------------------------------------------------------------------------------------------------------|------|
| 1 | exp propolis/                                                                                                 | 6002 |
| 2 | (propolis or propolin or "bee glue" or "bee bread" or "cera alba" or galangin or nivcrisol or Apitherapy).mp. | 8483 |
| 3 | 1 or 2                                                                                                        | 8483 |
| 4 | exp aphthous stomatitis/                                                                                      | 5825 |

|   |                                                                                                                                                                                                                                                                                                                                                                                                                                                                  |       |
|---|------------------------------------------------------------------------------------------------------------------------------------------------------------------------------------------------------------------------------------------------------------------------------------------------------------------------------------------------------------------------------------------------------------------------------------------------------------------|-------|
| 5 | ("Recurrent aphthous ulceration" or "Recurrent aphthous ulcer" or "Recurrent aphthous ulcers" or "Recurrent aphthous stomatitis").mp.                                                                                                                                                                                                                                                                                                                            | 1775  |
| 6 | ("canker sores" or "canker sore" or "periadenitis mucosa necrotica recurrens" or "aphthous ulcer" or "aphthous ulcers" or "aphthous ulceration" or "aphthous ulcerations" or "aphthous stomatitis" or "aphthous stomatitides" or "mouth ulcer" or "mouth ulcers" or "mouth ulceration" or "mouth ulcerations" or "oral ulcers" or "oral ulcer" or "oral ulceration" or "oral ulcerations" or Sutton's or Suttons or Sutton or Behcets or Behcet's or Behcet).mp. | 40709 |
| 7 | 4 or 5 or 6                                                                                                                                                                                                                                                                                                                                                                                                                                                      | 40709 |
| 8 | 3 and 7                                                                                                                                                                                                                                                                                                                                                                                                                                                          | 48    |
