# Supplementary material
Source: MDPI journal article supplement (https://www.mdpi.com/2304-6767/12/1/13)
Supplement: s1 [file s1]

**Supplementary File S3.**  
**Data extraction components**

**Identification:**

Study details:

Sponsorship Source

Country

Setting

Comments

Authors contact details:

Author's name

Email

Additional identification data:

Authors' conflict of interest declarations

Protocol or trial registry entry

**Methods:**

Unit of randomization:

Individual

Cluster

Additional methods data:

Date of study

Ethics approval

Follow-up after the treatment period

Method of diagnosis

Sample size calculation

Treatment duration

**Population:**

Inclusion criteria:

Exclusion criteria:

Group differences:

Additional population data:

Total number of participants randomised

Number of participants randomised per group

Total number of participants completed study

Total number of participants completed experimental group

Total number of participants completed control group

Number of participants lost to follow up in experimental group

Number of participants lost to follow up in control group

Number of participants withdraw from experimental group

Number of participants withdraw from control group

**Baseline characteristics:**

| Characteristics           | Experimental intervention | Control intervention | Overall |
|---------------------------|---------------------------|----------------------|---------|
| Gender                    |                           |                      |         |
| Age                       |                           |                      |         |
| Type of Ulcer             |                           |                      |         |
| Level of Pain experienced |                           |                      |         |
| Duration of Healing       |                           |                      |         |
| Frequency of Recurrence   |                           |                      |         |
| Adverse effects           |                           |                      |         |
| Quality of life           |                           |                      |         |

**Interventions:**

| Characteristics         | Experimental intervention | Control intervention |
|-------------------------|---------------------------|----------------------|
| Type of intervention    |                           |                      |
| Dose                    |                           |                      |
| Route of administration |                           |                      |
| Duration                |                           |                      |
| Frequency               |                           |                      |
| Concomitant treatment   |                           |                      |

**Outcomes after intervention:**

| Characteristics           | Experimental intervention | Control intervention | Overall |
|---------------------------|---------------------------|----------------------|---------|
| Type of Ulcer             |                           |                      |         |
| Level of Pain experienced |                           |                      |         |
| Duration of Healing       |                           |                      |         |
| Frequency of Recurrence   |                           |                      |         |
| Adverse effects           |                           |                      |         |
| Quality of life           |                           |                      |         |

**Outcome measures:**

|  |                           |                      |
|--|---------------------------|----------------------|
|  | Experimental intervention | Control intervention |
|--|---------------------------|----------------------|

|             |  |  |
|-------------|--|--|
| Description |  |  |
| N           |  |  |
| Mean        |  |  |
| SD          |  |  |
| 95% CI      |  |  |
| P-value     |  |  |
| Median      |  |  |
| IQR         |  |  |
| SE          |  |  |
| Narrative   |  |  |
|             |  |  |
